# Supplementary material
Source: publisher figshare collection journal article supplement (https://geolsoc.figshare.com/ndownloader/files/35156105)
Supplement: Supplementary file 1 [file 35156105]

## Sheet: Sheet1
Results_export_1	Results_export_2	Results_export_3
Results of Monte Carlo unmixing model
wghtings applied to PDPs and CDFs
number of grains in each trial=	N/A
trials=	10000
percent accepted trials=	1
Cross-correlation cutoff=	0
Kuiper V value cutoff=	1
KS D value cutoff=	1
Cross-correlation	0.677 +/- 0.03				Total Percentage Contribution
Sample Names	Relative Contribution	Standard Deviation	Percent		Coahuila	Maya
PC03/Coahuila	0.748893	0.184771	74.9		78.2	21.8
La Joya/Coahuila	0.0330055	0.0422274	3.3
Santa Rosa/Maya	0.12863	0.132558	12.9
Baldy Granites/Maya	0.00933946	0.0121471	0.9
Baldy Seds/Maya	0.0591815	0.0721779	5.9
Chicxulub/Maya	0.0114094	0.013486	1.1
Macal Granites/Maya	0.00954085	0.0120946	1
Kuiper V value	0.191 +/- 0.011
Sample Names	Relative Contribution	Standard Deviation			Coahuila	Maya
PC03/Coahuila	0.735981	0.184131	73.6		77.2	22.7
La Joya/Coahuila	0.0363259	0.0476458	3.6
Santa Rosa/Maya	0.0702717	0.0896378	7
Baldy Granites/Maya	0.00902861	0.0128414	0.9
Baldy Seds/Maya	0.128061	0.143178	12.8
Chicxulub/Maya	0.0112588	0.0130352	1.1
Macal Granites/Maya	0.00907283	0.0126711	0.9
KS D value	0.184 +/- 0.011
Sample Names	Relative Contribution	Standard Deviation
PC03/Coahuila	0.739844	0.183944
La Joya/Coahuila	0.0345361	0.0466256
Santa Rosa/Maya	0.0660477	0.0875022
Baldy Granites/Maya	0.00917284	0.012829
Baldy Seds/Maya	0.131029	0.149729
Chicxulub/Maya	0.0107035	0.0127677
Macal Granites/Maya	0.00866668	0.0119878
